# Supplementary material for: Retinoic acid delays initial photoreceptor differentiation and results in a highly structured mature retinal organoid
Source: PubMed Central journal article supplement (PMC9482314; doi:10.1186/s13287-022-03146-x), 2022-09-16
Supplement: 13287_2022_3146_MOESM1_ESM.pdf [file 13287_2022_3146_MOESM1_ESM.pdf]

## **Additional File 1**

### **Retinoic acid delays initial photoreceptor differentiation and results in a highly structured mature retinal organoid**

Carla Sanjurjo-Soriano, Nejla Erkilic, Krishna Damodar, Hassan Boukhaddaoui, Michalitsa Diakatou, Marcela Garita-Hernandez, Daria Mamaeva, Gregor Dubois, Zhour Jazouli, Carla Jimenez-Medina, Olivier Goureau, Isabelle Meunier & Vasiliki Kalatzis

- Table S1:** Primers used for qPCR analysis of gene expression
- Table S2:** Primary and secondary antibodies used for immunofluorescence studies
- Figure S1:** Expression of photoreceptor markers in non-laminated Protocol 1 organoids
- Figure S2:** Temporal gene expression of eye-field specification and non-photoreceptor markers in Protocol 2 and Protocol 3 organoids
- Figure S3:** Immunofluorescence studies of Protocol 2 and Protocol 3 organoids
- Figure S4:** Immunofluorescence studies of Protocol 3 organoids with or without RA
- Figure S5:** Cones in early-stage Protocol 2 and Protocol 3 organoids

**Table S1:** Primers used for qPCR analysis of gene expression

| <b>Gene</b>                   | <b>Forward primer 5'-3'</b> | <b>Reverse primer 5'-3'</b> | <b>Amplicon</b> | <b>Efficiency</b> |
|-------------------------------|-----------------------------|-----------------------------|-----------------|-------------------|
| <i>ARR3</i>                   | CCCAGAGCTTTGCAGTAACC        | CACAGGACACCATCAGGTTG        | 189 bp          | 1.79              |
| <i>BRN3A</i>                  | AGAAGCAGAAGCGGATGAAA        | CAGAGAATGGGTGGAGGAAA        | 194 bp          | 1.90              |
| <i>CRX</i>                    | TGATGGTGGGATTGGAAAAT        | GCCTTGTGAACTCCACCAAT        | 248 bp          | 2.04              |
| <i>GAD2</i>                   | TCGTCAGATTCCAAGTGCTG        | TAGGGCATTCTACCCGTTG         | 169 bp          | 1.81              |
| <i>GLAST1</i>                 | AACCCATCGACAGTGAAACC        | TCCCTTGTGTTTTGGAGGAC        | 184 bp          | 1.93              |
| <i>LIM1</i>                   | GCCAAAGAGAACAGCCTTCACTC     | GGTCGTCATTCTCGTTGCTACC      | 148 bp          | 1.94              |
| <i>NRL</i>                    | GGCTCCACACCTTACAGCTC        | ATGGCCTCTTCAGGACTCAG        | 170 bp          | 1.96              |
| <i>NR2E3</i>                  | CACTTCATGGCCAGCCTTAT        | CTGGAGAACACAGGCAGGTT        | 215 bp          | 1.80              |
| <i>OPN1MW</i>                 | GAACCAGGTCTATGGCTACTTCG     | TCTCACATTGCCAAAGGGCTT       | 154 bp          | 2.04              |
| <i>OTX2</i>                   | GCAGAGGTCCTATCCCATGA        | CTGGGTGGAAAGAGAAGCTG        | 211 bp          | 1.95              |
| <i>PKC<math>\alpha</math></i> | GTGGCAAAGGAGCAGAGAAC        | TGTAAGATGGGGTGCACAAA        | 151 bp          | 1.92              |
| <i>RAX</i>                    | GTCCTAAGCGTGCTTTCAG         | CATGCCAGGGTCTTGGTACT        | 200 bp          | 1.99              |
| <i>RCVRN</i>                  | AGCTCCTTCCAGACGATGAA        | CAAACCTGGATCAGTCGAGA        | 150 bp          | 2.02              |
| <i>RHO</i>                    | ACAGGATGCAATTTGGAGGGC       | GCTCATGGGCTTACACACCA        | 111 bp          | 2.06              |
| <i>GRK1</i>                   | GCCCGTGAAGTACCCTGATA        | TTGGAGTCTGGGATGAAAGG        | 198 bp          | 2.02              |
| <i>SIX3</i>                   | CAGAAGACGCATTGCTTCAA        | GCCGGTCTTAAACCAGTTG         | 151 bp          | 2.00              |
| <i>VSX2</i>                   | CTGACTCTGGACCATGCTGA        | GAGCTGGGAAGGAGGACTCT        | 189 bp          | 1.87              |
| <i>GAPDH</i>                  | AACCATGAGAAGTATGACAAC       | CTTCCACGATACCAAAGTT         | 112 bp          | 2.02              |

**Table S2:** Primary and secondary antibodies used for immunofluorescence studies

| <b>Antibody</b>                               | <b>Dilution</b> | <b>Company Cat #; RRID</b>                       |
|-----------------------------------------------|-----------------|--------------------------------------------------|
| Goat polyclonal anti-Arrestin 3               | 1/200           | Novus Biologicals Cat# NBP1-37003; AB_2060085    |
| Mouse monoclonal anti-CRX, clone 4G11         | 1/2000          | Abnova Cat# H00001406-M02; AB_606098             |
| Mouse monoclonal anti-NR2E3/PNR, clone H7223  | 1/150           | R&D Systems Cat# PP-H7223-00; AB_2155481         |
| Rabbit polyclonal anti-Opsin, Red/Green       | 1/500           | Millipore Cat# AB5405; AB_177456                 |
| Rabbit polyclonal anti-Recoverin              | 1/2000          | Millipore Cat# AB5585; AB_2253622                |
| Mouse monoclonal anti-Rhodopsin, clone 4D2    | 1/250           | Millipore Cat# MABN15; AB_10807045               |
| Donkey anti-Mouse IgG (H+L), Alexa Fluor 488  | 1/500           | ThermoFisher Scientific Cat# A-21202; AB_141607  |
| Donkey anti-Rabbit IgG (H+L), Alexa Fluor 594 | 1/500           | ThermoFisher Scientific Cat# A-21207; AB_141637  |
| Donkey anti-Goat IgG (H+L), Alexa Fluor 594   | 1/500           | ThermoFisher Scientific Cat# A-11058; AB_2534105 |

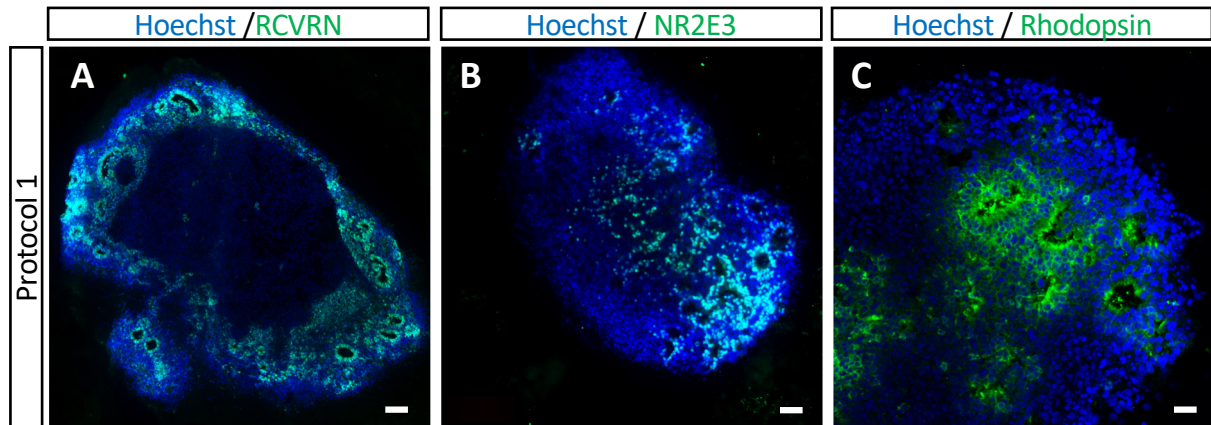

**Figure S1: Expression of photoreceptor markers in non-laminated Protocol 1 organoids.** A) Representative image of RCVRN expression in green, which is localized to rosette-like structures of the non-laminated retinal organoids at day (D) 105 of differentiation. Scale bar = 100  $\mu\text{m}$ . B-C: Representative images of NR2E3 (B) or rhodopsin (C) expression in green in rosette-like structures of late-stage retinal organoids at D300 of differentiation. Nuclei are stained with Hoechst in blue. Scale bars= 50  $\mu\text{m}$ .



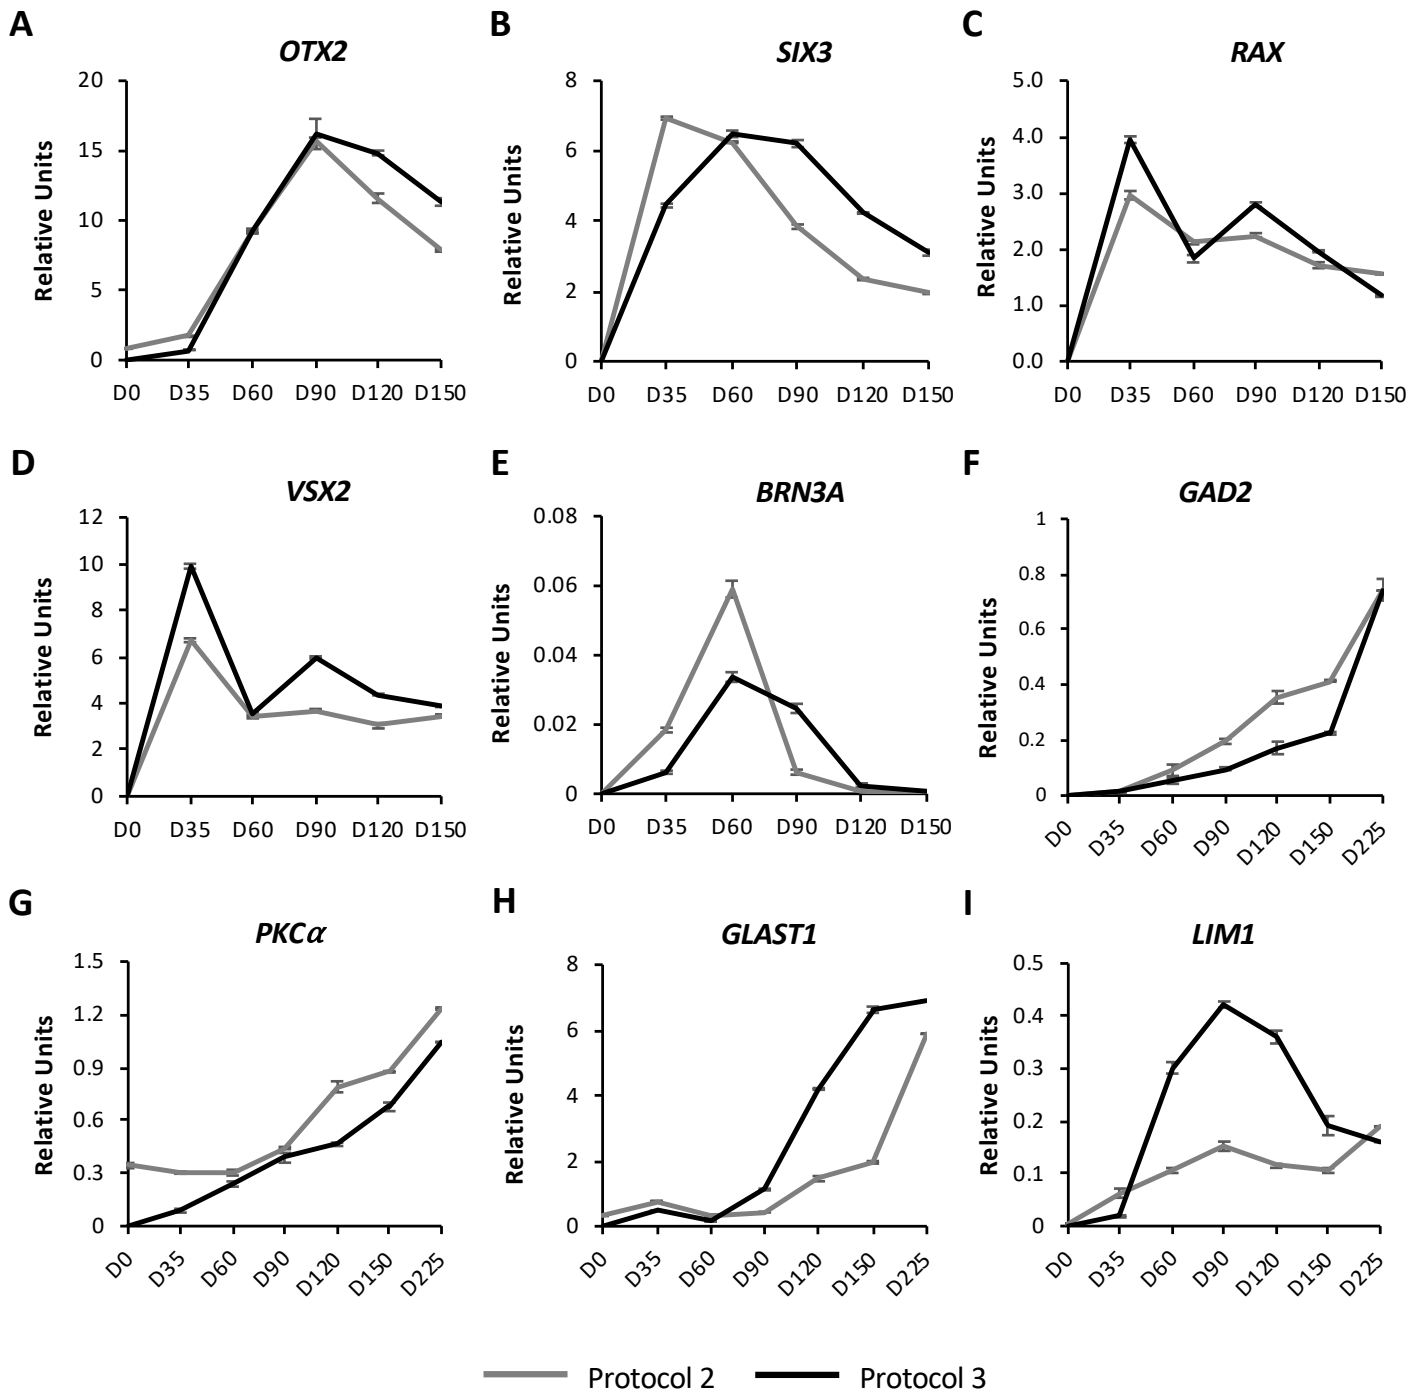

**Figure S2: Temporal gene expression of eye-field specification and non-photoreceptor markers in Protocol 2 and Protocol 3 organoids.** Pools of 25-30 retinal organoids differentiated with Protocol 2 or Protocol 3 were collected at different time points (D35, D60, D90, D120, D150 and/or D225) and relative gene expression was measured by qPCR for the eye-field specification markers: *OTX2* (A), *SIX3* (B), *RAX* (C) and *VSX2* (D). Relative gene expression was also measured for the retinal ganglion cell marker *BRN3A* (E), the amacrine cell marker *GAD2* (F), the bipolar cell marker *PKCα* (G), the Müller cell marker *GLAST1* (H) and the horizontal cell marker *LIM1* (I). Grey lines represent Protocol 2 and black lines Protocol 3. Data is normalised to the housekeeping gene *GAPDH* and shown as mean ± SEM, n=3.

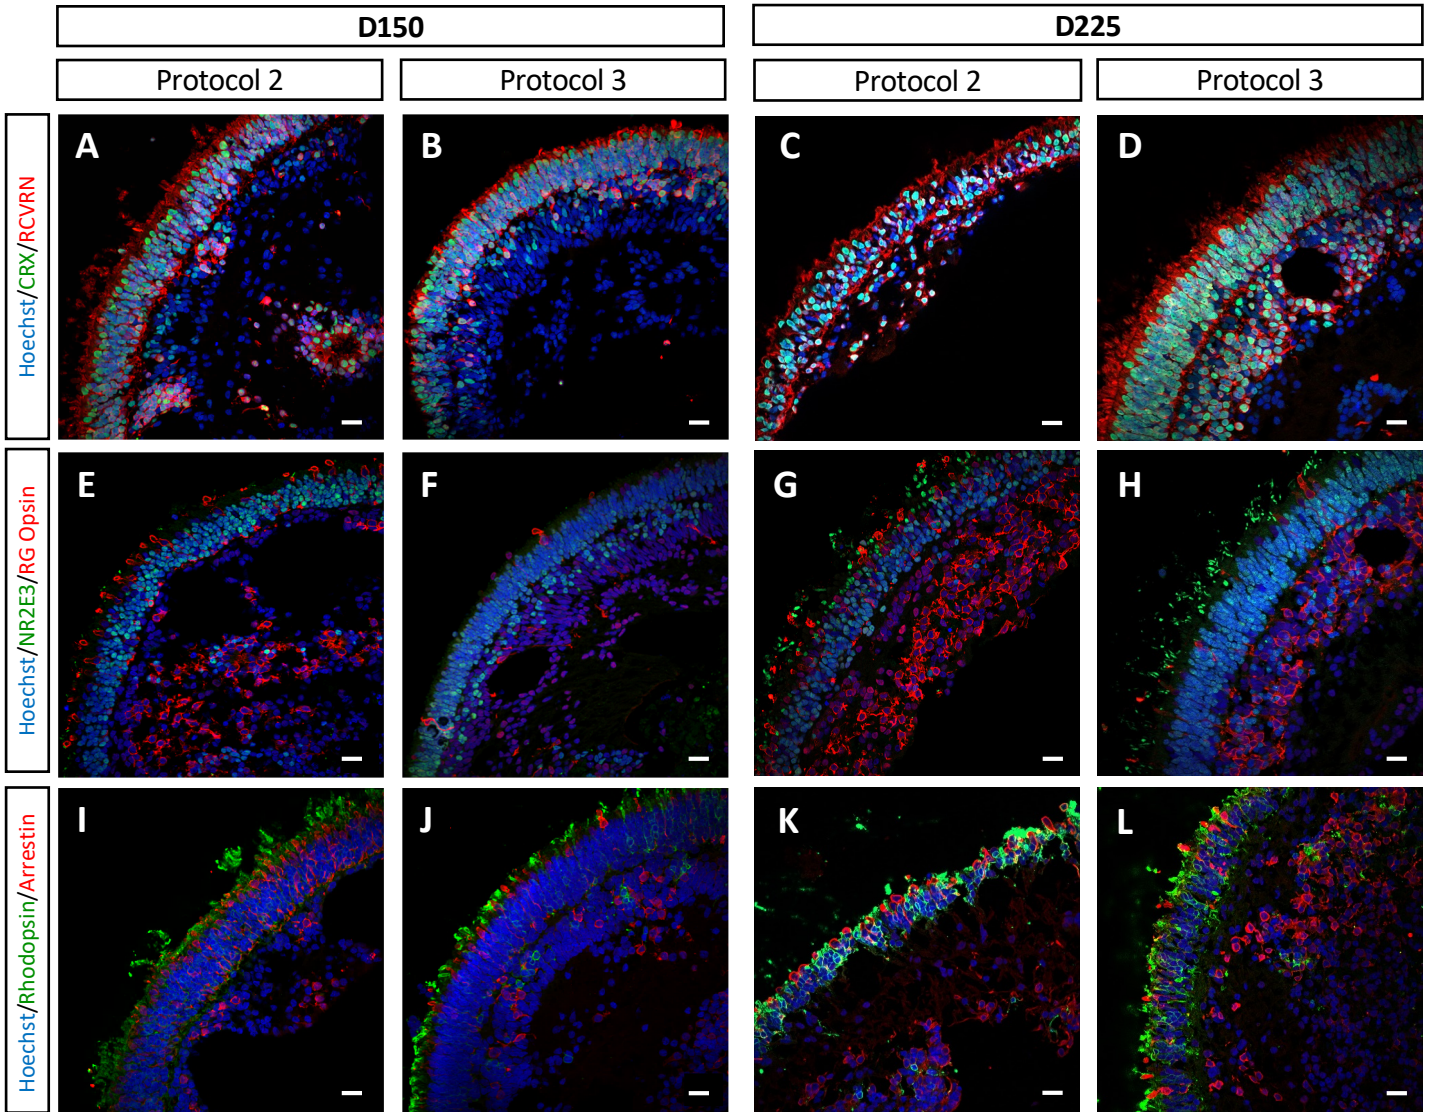

**Figure S3: Immunofluorescence studies of Protocol 2 and Protocol 3 organoids.** The same images shown in Figure 3 with the additional channel showing the Hoechst-stained ONL (in blue). Retinal organoids were analysed at D150 (A, B, E, F, I, J) and D225 (C, D, G, H, K, L) of differentiation. CRX in green and RCVRN in red in organoids generated with Protocol 2 (A, C) and Protocol 3 (B, D). NR2E3 in green and RG opsin in red in organoids generated with Protocol 2 (E, G) and Protocol 3 (F, H). Rhodopsin in green and arrestin in red in organoids generated with Protocol 2 (I, K) and Protocol 3 (J, L). Scale bars = 20  $\mu$ m.

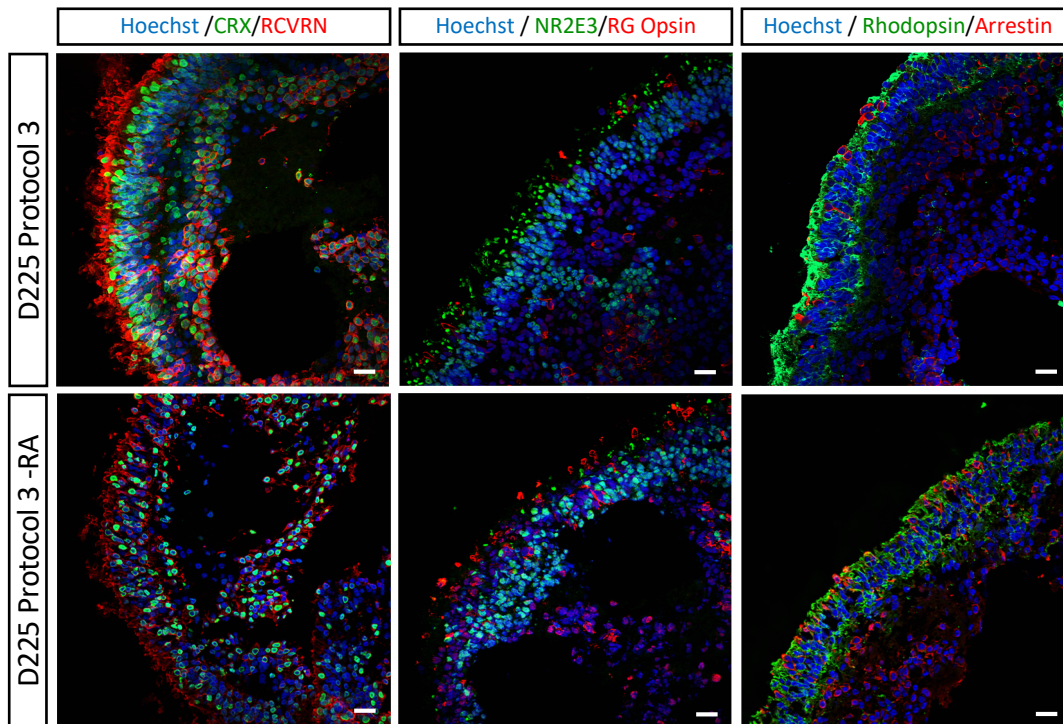

**Figure S4: Immunofluorescence studies of Protocol 3 organoids with or without RA.** The same images shown in Figure 4 with the additional channel showing the Hoechst-stained ONL (in blue). Left-hand panels, CRX in green and RCVRN in red; middle panels, NR2E3 in green and RG opsin in red; right-hand panels, rhodopsin in green and arrestin in red. Scale bars = 20  $\mu$ m.

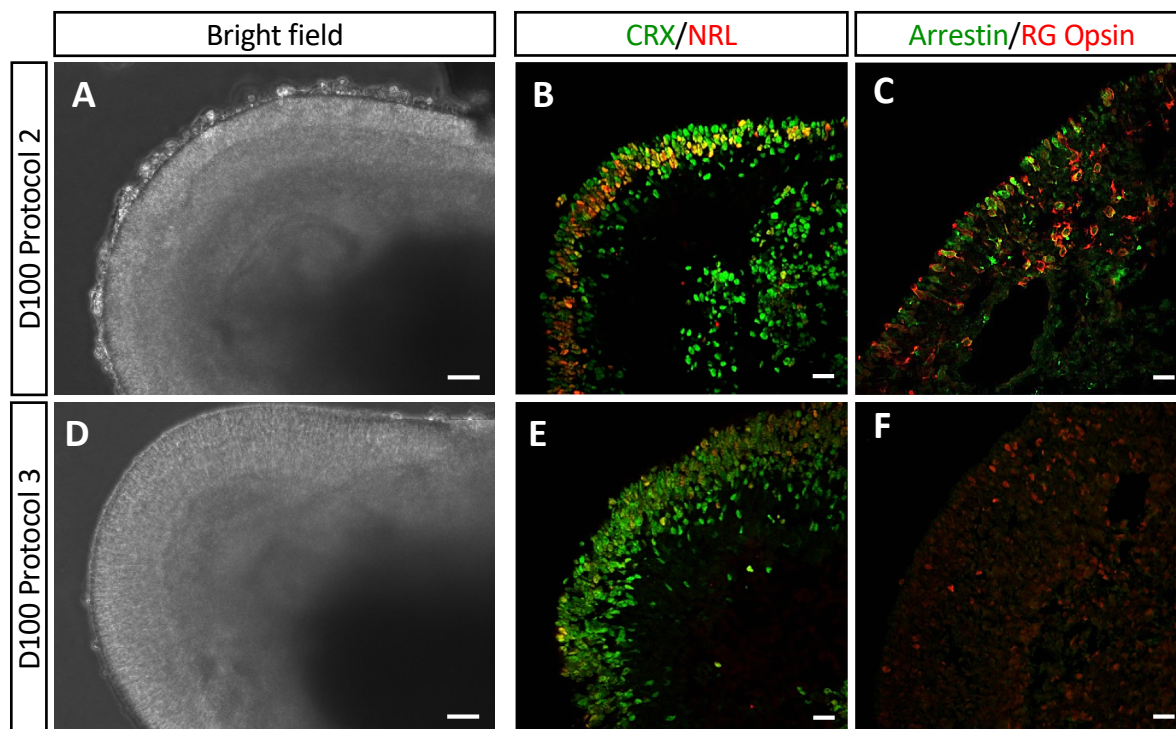

**Figure S5: Cones in early-stage Protocol 2 and Protocol 3 organoids.** Representative bright-field images of retinal organoids at D100 differentiated with Protocol 2 (**A**) or Protocol 3 (**D**). Scale bars = 50  $\mu$ m. Representative IF images of CRX in green and NRL in red in Protocol 2 (**B**) and Protocol 3 (**E**) organoids. Representative IF images of arrestin in green and RG opsin in red in Protocol 2 (**C**) and Protocol 3 (**F**) organoids. Scale bars = 20  $\mu$ m.
